# Supplementary material for: Characterisation of Campylobacter spp. Isolated from Poultry in KwaZulu-Natal, South Africa
Source: Antibiotics (Basel). 2020 Jan 21;9(2):42. doi: 10.3390/antibiotics9020042 (PMC7168222; doi:10.3390/antibiotics9020042)
Supplement: Supplementary file 1 [file antibiotics-09-00042-s001.xlsx]

## Sheet: Individual antibiograms
Antibiotic Resistance, Virulence and Clonality of Campylobacter spp. Isolated from Poultry in KwaZulu-Natal South Africa Stephanie Pillay1, Daniel G. Amoako1,2*, Akebe L. K. Abia1, Anou M. Somboro1,2, Christiana O. Shobo1,2, Keith Perrett3, Linda A. Bester2, Sabiha Y. Essack1
Table S1 Antibiogrm of individual isolates
C. jejuni Isolate name	Source	Resistance Pattern	C. coli Isolate name	Source	Resistance Pattern
CJA1	Abattoir	AMP-NAL-ERY-GEN-CEFT-CLI	CCR1	Retail	AMP-NAL-ERY-GEN-CEFT-CLI
CJA2	Abattoir	AMP-NAL-ERY-GEN-CEFT-CLI	CCW1	Water	AMP-NAL-CIP-ERY-CEFT-CLI
CJA3	Abattoir	AMP-NAL-ERY-GEN-CEFT-CLI	CCW2	Water	AMP-NAL-CIP-ERY-CEFT-CLI
CJR1	Retail	AMP-NAL-ERY-GEN-CEFT-CLI	CCW3	Water	AMP-NAL-CIP-ERY-CEFT-CLI
CJR2	Retail	AMP-NAL-ERY-GEN-CEFT-CLI	CCW4	Water	AMP-NAL-CIP-ERY-CEFT-CLI
CJR3	Retail	AMP-NAL-ERY-GEN-CEFT-CLI	CCR2	Retail	AMP-NAL-CIP-ERY-CEFT-CLI
CJR4	Retail	AMP-NAL-ERY-GEN-CEFT-CLI	CCR3	Retail	AMP-NAL-CIP-ERY-CEFT-CLI
CJR5	Retail	AMP-NAL-ERY-GEN-CEFT-CLI	CCR4	Retail	AMP-NAL-CIP-ERY-CEFT-CLI
CJA5	Abattoir	AMP-NAL-CIP-ERY-CEFT-CLI	CCR5	Retail	AMP-NAL-CIP-ERY-CEFT-CLI
CJA6	Abattoir	AMP-NAL-CIP-ERY-CEFT-CLI	CCR6	Retail	AMP-NAL-CIP-ERY-CEFT-CLI
CJA7	Abattoir	AMP-NAL-CIP-ERY-CEFT-CLI	CCR7	Retail	AMP-NAL-ERY-GEN-CLI
CJR6	Retail	AMP-NAL-CIP-ERY-CEFT-CLI	CCR8	Retail	AMP-NAL-ERY-CLI
CJR7	Retail	AMP-NAL-CIP-ERY-CEFT-CLI	CCW5	Water	AMP-NAL-ERY-CLI
CJR8	Retail	AMP-NAL-CIP-ERY-CEFT-CLI	CCW6	Water	AMP-NAL-ERY-CLI
CJR9	Retail	AMP-NAL-CIP-ERY-CEFT-CLI	CCR9	Retail	AMP-CIP-ERY-CLI
CJR10	Retail	AMP-NAL-CIP-ERY-CEFT-CLI	CCA1	Abattoir	AMP-ERY-GENT-CLI
CJR11	Retail	AMP-NAL-CIP-ERY-CEFT-CLI	CCR10	Retail	AMP-ERY-CEFT-CLI
CJR12	Retail	AMP-NAL-CIP-ERY-CEFT-CLI	CCR11	Retail	ERY-CEFT-CLI
CJR13	Retail	AMP-NAL-CIP-ERY-CEFT-CLI	CCR12	Retail	AMP-NAL-CEFT
CJR14	Retail	AMP-NAL-CIP-CEFT-CLI	CCR13	Retail	AMP-NAL-CEFT
CJR15	Retail	AMP-NAL-CIP-CEFT-CLI	CCA2	Abattoir	AMP-NAL-CEFT
CJR16	Retail	AMP-NAL-CIP-CEFT-CLI	CCA3	Abattoir	ERY-GENT- CLI
CJW1	Water	AMP-NAL-CIP-CEFT-CLI	CCR14	Retail	AMP-ERY-CLI
CJA8	Abattoir	AMP-NAL-ERY-CEFT-CLI	CCW7	Water	AMP-ERY-CLI
CJA9	Abattoir	AMP-NAL-ERY-CEFT-CLI	CCR15	Retail	NAL-ERY-CLI
CJR17	Retail	AMP-CIP-ERY-CEFT	CCR16	Retail	CIP-ERY-GENT
CJR18	Retail	AMP-NAL-ERY-CEFT	CCW8	Water	ERY-CLI
CJR19	Retail	NAL-CIP-ERY-CEFT	CCW9	Water	ERY-CLI
CJR20	Retail	NAL-CIP-ERY-CEFT	CCW10	Water	ERY-CLI
CJR21	Retail	AMP-ERY-GENT-CLI	CCW11	Water	ERY-CLI
CJR22	Retail	NAL-ERY-GENT-CLI	CCR17	Retail	ERY-CLI
CJR23	Retail	AMP-NAL-ERY-GENT	CCR18	Retail	ERY-CLI
CJR24	Retail	AMP-NAL-CEFT	CCR19	Retail	ERY-CLI
CJR25	Retail	AMP-NAL-ERY	CCR20	Retail	ERY-CLI
CJR26	Retail	ERY-CLI	CCR21	Retail	ERY-CLI
CJR27	Retail	ERY-CLI	CCR22	Retail	ERY-CLI
CJR28	Retail	ERY-CLI	CCR23	Retail	ERY-CLI
CJR29	Retail	ERY-CLI	CCA4	Abattoir	ERY-CLI
CJW2	Water	ERY-CLI	CCA5	Abattoir	ERY-CLI
CJW3	Water	ERY-CLI	CCA6	Abattoir	ERY-CLI
CJW4	Water	ERY-CLI	CCR24	Retail	AMP-CLI
CJR30	Retail	AMP- CEFT	CCR25	Retail	AMP-CLI
CJW5	Water	ERY	CCA7	Abattoir	AMP-GENT
CJW6	Water	ERY	CCA8	Abattoir	AMP-GENT
CJR30	Retail	ERY	CCR26	Retail	AMP-ERY
			CCR27	Retail	AMP-ERY
			CCR28	Retail	AMP-ERY
			CCR29	Retail	ERY
			CCR30	Retail	ERY
			CCR31	Retail	ERY
			CCR32	Retail	ERY
			CCA9	Abattoir	CEFT
			CCA10	Abattoir	CEFT
			CCA11	Abattoir	CEFT
			CCA12	Abattoir	CLI
			CCA13	Abattoir	CLI
			CCA14	Abattoir	CLI
			CCA15	Abattoir	CLI
			CCR33	Retail	AMP
			CCR34	Retail	AMP
